# Supplementary material for: Battery Electric Tractors: Small-Scale Organic Growers’ Preferences, Perceptions, and Concerns
Source: MDPI journal article supplement (doi:10.3390/en15228648), 2022-11-18
Supplement: s1 [file s1]

Archive with 1 entries (1 files):
- energies-1996281-supplementary.pdf
